# Supplementary material for: Study on Mechanism of Lactobacillus rhamnosus Mitigating PFOA/PFOS Toxicity in Adult Zebrafish (Danio rerio)
Source: Preprints.org preprint supplement (doi:10.20944/preprints202310.1870.v1), 2023-10-30
Supplement: Supplementary file 1 [file supplementary]

---

# Study on mechanism of *Lactobacillus rhamnosus* mitigating PFOA/PFOS toxicity in adult zebrafish (*Danio rerio*)

Guanyi Li <sup>1,†</sup>, Sibao Chen<sup>2,†</sup>, Ruixuan Li <sup>1</sup>, Mengyan Wang <sup>1</sup>, Jinjin Li <sup>3</sup>, Mengmeng Yi <sup>4</sup>, Yingxue Sun <sup>1</sup> and Chun Wang <sup>1\*</sup>

<sup>1</sup> State Environmental Protection Key Laboratory of Food Chain Pollution Control, Key Laboratory of Cleaner Production and Integrated Resource Utilization of China National Light Industry, School of Ecology and Environment, Beijing Technology and Business University, Beijing 100048, China

<sup>2</sup> Changjiang Institute of Survey Planning Design and Research, Key Laboratory of Changjiang Regulation and Protection of Ministry of Water Resources, Wuhan, 430010, China

<sup>3</sup> School of Life Sciences, Qilu Normal University, Jinan, 250200, China

<sup>4</sup> Key Laboratory of Tropical and Subtropical Fishery Resources Application and Cultivation, Ministry of Agriculture and Rural Affairs, Pearl River Fisheries Research Institute, Chinese Academy of Fishery Science, Guangzhou, 510380, China

\* Correspondence: [chun\\_wang@btbu.edu.cn](mailto:chun_wang@btbu.edu.cn) (C. Wang).

† These authors contributed equally to this work.

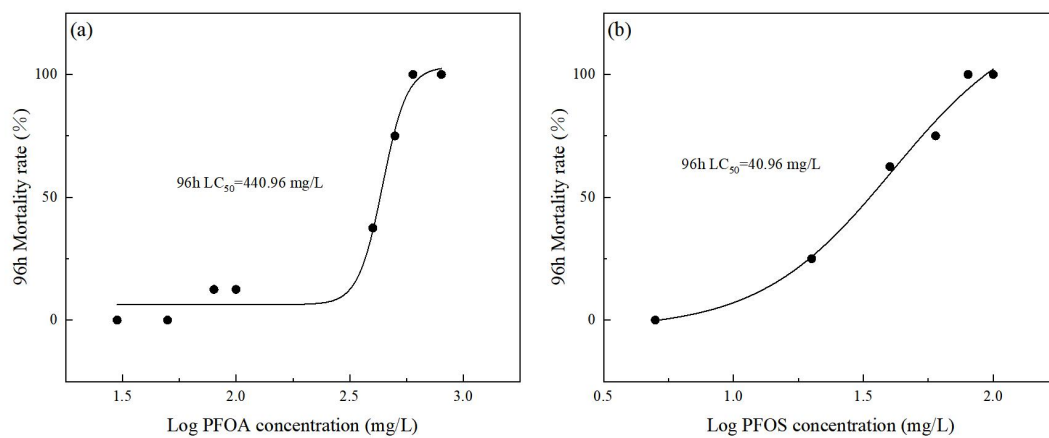

**Figure S1.** The LC<sub>50</sub> of the PFOA and PFOS.

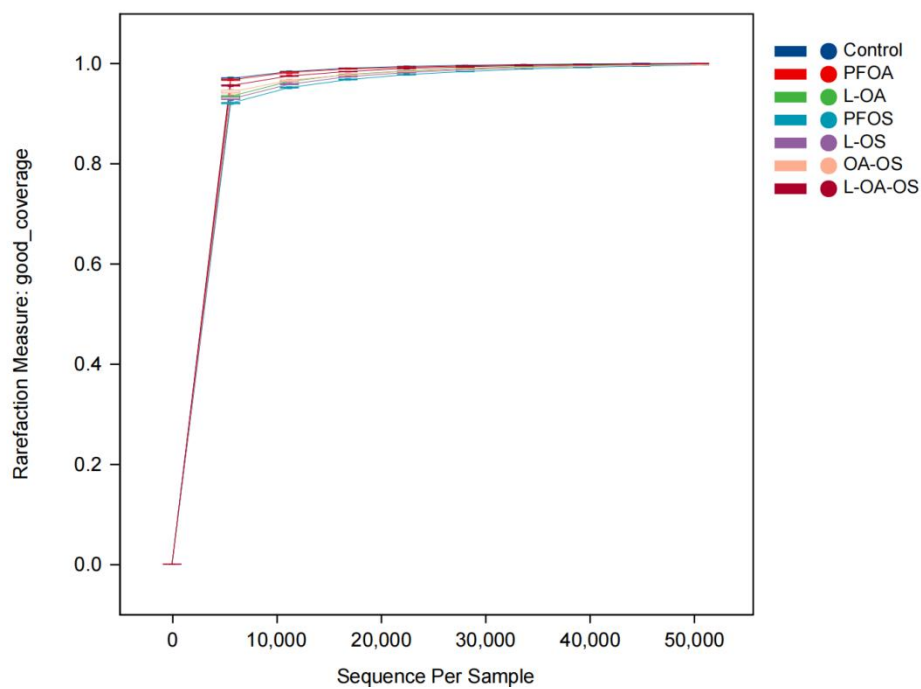

**Figure S2.** Rarefaction curves of OTUs clustered at 97% sequence identity across different samples.

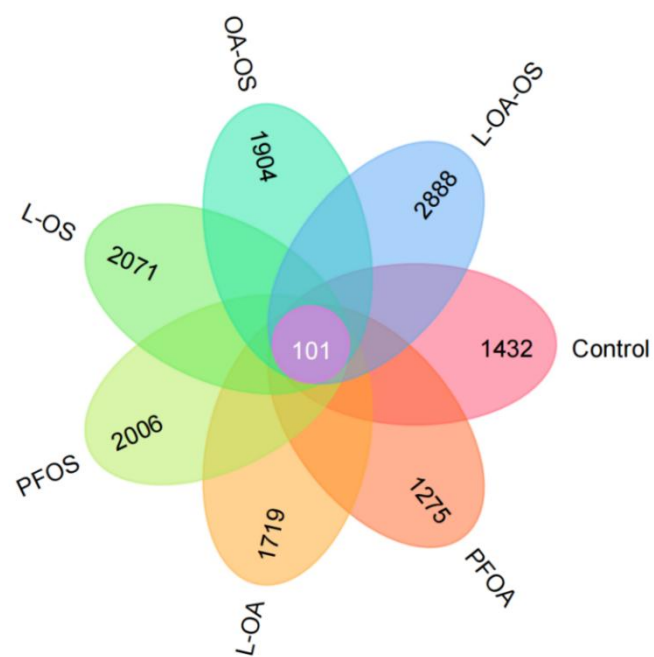

**Figure S3.** Venn diagram for different exposure treatment groups.
